# Supplementary material
Source: publisher figshare collection journal article supplement (https://sage.figshare.com/ndownloader/files/21786603)
Supplement: Supplementary file 1 [file 21786603]

List of figure captions:

|        |                                                                                 |
|--------|---------------------------------------------------------------------------------|
| Fig.1  | Experimental schematic                                                          |
| Fig.2  | Experimental device                                                             |
| Fig.3  | Poppet structure                                                                |
| Fig.4  | Poppet valve structure                                                          |
| Fig.5  | The air bubble in the pressure measures cavity of the poppet valve with orifice |
| Fig.6  | Displacement and pressure                                                       |
| Fig.6  | Displacement and pressure (part)                                                |
| Fig.7  | Poppet instability vibration in one cycle (0T)                                  |
| Fig.7  | Poppet instability vibration in one cycle (0.16T)                               |
| Fig.7  | Poppet instability vibration in one cycle (0.33T)                               |
| Fig.7  | Poppet instability vibration in one cycle (0.5T)                                |
| Fig.7  | Poppet instability vibration in one cycle (0.66T)                               |
| Fig.7  | Poppet instability vibration in one cycle (0.83T)                               |
| Fig.7  | Poppet instability vibration in one cycle (1T)                                  |
| Fig.8  | Micro bubbles motion in the pressure-measuring orifice (t=3.13ms)               |
| Fig.8  | Micro bubbles motion in the pressure-measuring orifice (t=3.3ms)                |
| Fig.8  | Micro bubbles motion in the pressure-measuring orifice (t=3.46ms)               |
| Fig.8  | Micro bubbles motion in the pressure-measuring orifice (t=3.63ms)               |
| Fig.8  | Micro bubbles motion in the pressure-measuring orifice (t=3.8ms)                |
| Fig.8  | Micro bubbles motion in the pressure-measuring orifice (t=3.96ms)               |
| Fig.8  | Micro bubbles motion in the pressure-measuring orifice (t=4.13ms)               |
| Fig.8  | Micro bubbles motion in the pressure-measuring orifice (t=4.3ms)                |
| Fig.8  | Micro bubbles motion in the pressure-measuring orifice (t=4.46ms)               |
| Fig.9  | N-S21-B10-1.4 Displacement and pressure                                         |
| Fig.10 | N-S21-B10-1.6 Displacement and pressure                                         |
| Fig.11 | N-S21-B10-1.6 Valve cavitation region t=0                                       |
| Fig.11 | N-S21-B10-1.6 Valve cavitation region t=1ms                                     |
| Fig.11 | N-S21-B10-1.6 Valve cavitation region t=1.8ms                                   |
| Fig.11 | N-S21-B10-1.6 Valve cavitation region t=2.5ms                                   |
| Fig.11 | N-S21-B10-1.6 Valve cavitation region t=2.8ms                                   |
| Fig.11 | N-S21-B10-1.6 Valve cavitation region t=3.8ms                                   |
| Fig.12 | N-S21-B10-1.6 poppet valve lift cavitation t=0ms                                |
| Fig.12 | N-S21-B10-1.6 poppet valve lift cavitation t=4.2ms                              |
| Fig.12 | N-S21-B10-1.6 poppet valve lift cavitation t=7.8ms                              |
| Fig.12 | N-S21-B10-1.6 poppet valve lift cavitation t=11.3ms                             |
| Fig.12 | N-S21-B10-1.6 poppet valve lift cavitation t=15.3ms                             |
| Fig.12 | N-S21-B10-1.6 poppet valve lift cavitation t=19.2ms                             |
| Fig.13 | N-S21-B-1.0 bubble change process at valve port t=0.5ms                         |
| Fig.13 | N-S21-B-1.0 bubble change process at valve port t=0ms                           |
| Fig.13 | N-S21-B-1.0 bubble change process at valve port t=1.0ms                         |
| Fig.13 | N-S21-B-1.0 bubble change process at valve port t=1.5ms                         |

- Fig.13 N-S21-B-1.0 bubble change process at valve port  $t=2.0\text{ms}$
- Fig.13 N-S21-B-1.0 bubble change process at valve port  $t=2.8\text{ms}$
- Fig.13 N-S21-B-1.0 bubble change process at valve port  $t=3.5\text{ms}$
- Fig.13 N-S21-B-1.0 bubble change process at valve port  $t=3.8\text{ms}$
- Fig.14 N-S21-B10-2.2 Displacement
- Fig.15 N-S21-B10-2.2 Displacement
- Fig.16 N-S21-B10-2.4 Displacement and pressure
- Fig.17 N-S21-B10-2.6 Displacement and pressure
- Fig.18 N-S21-B10-3.0 Displacement and pressure
- Fig.19 N-S21-B10-3.0 Displacement and pressure of repeated experiment
- Fig.20 N-S21-B10-3.0(2) Valve cavitation region  $t=0\text{ms}$
- Fig.20 N-S21-B10-3.0(2) Valve cavitation region  $t=0.5\text{ms}$
- Fig.20 N-S21-B10-3.0(2) Valve cavitation region  $t=2.2\text{ms}$
- Fig.20 N-S21-B10-3.0(2) Valve cavitation region  $t=3.8\text{ms}$
- Fig.21 Pressure pulsation spectrum of Gear pump flow
- Fig.22 Inlet pressure curve when the poppet valve is closed
- Fig.22 Inlet pressure curve when the poppet valve is closed ( part )
- Fig.23 Pressure spectrum in experimental hydraulic pipeline
- Fig.24 Axial vibration frequency of poppet
- Fig.25 Inlet pressure spectrum of Poppet valve ( N-S21-B10-3.0)
- Fig.26 Inlet pressure spectrum of relief valve (N-S21-B10-3.0)
- Fig.27 Inlet pressure spectrum of poppet valve (N-S21-B10-2.8)
- Fig.28 Inlet pressure spectrum of relief valve ( N-S21-B10-2.8)
